# Supplementary material for: Segmentation of Potato Consumers Based on Sensory and Attitudinal Aspects
Source: MDPI journal article supplement (doi:10.3390/foods9020161), 2020-02-07
Supplement: s1 [file s1]

1 **Segmentation of potato consumers based on sensory and attitudinal aspects**

2 Chetan Sharma<sup>1</sup>, Sastry Jayanty<sup>2</sup>, Edgar Chambers IV<sup>3</sup> and Martin Talavera<sup>1</sup>

3 **Corresponding author:** Dr. Martin Talavera, Email: [talavera@ksu.edu](mailto:talavera@ksu.edu), Phone: 913 307 732

---

<sup>1</sup> Centre for Sensory Analysis and Consumer Behavior, Kansas State University, Olathe – 66061

<sup>2</sup> San Luis Valley Research Center, Department of Horticulture and Landscape Architecture, Colorado State University, Center – 81125

<sup>3</sup> Centre for Sensory Analysis and Consumer Behavior, Kansas State University, Manhattan – 66502

## Supplementary data files –

**Fig. 1** IPM trace plots of each attribute with respect to consumers in cluster 1 OVERALL LIKING for potato samples; grey dotted line – Linear equation, red dotted line – Polynomial equation

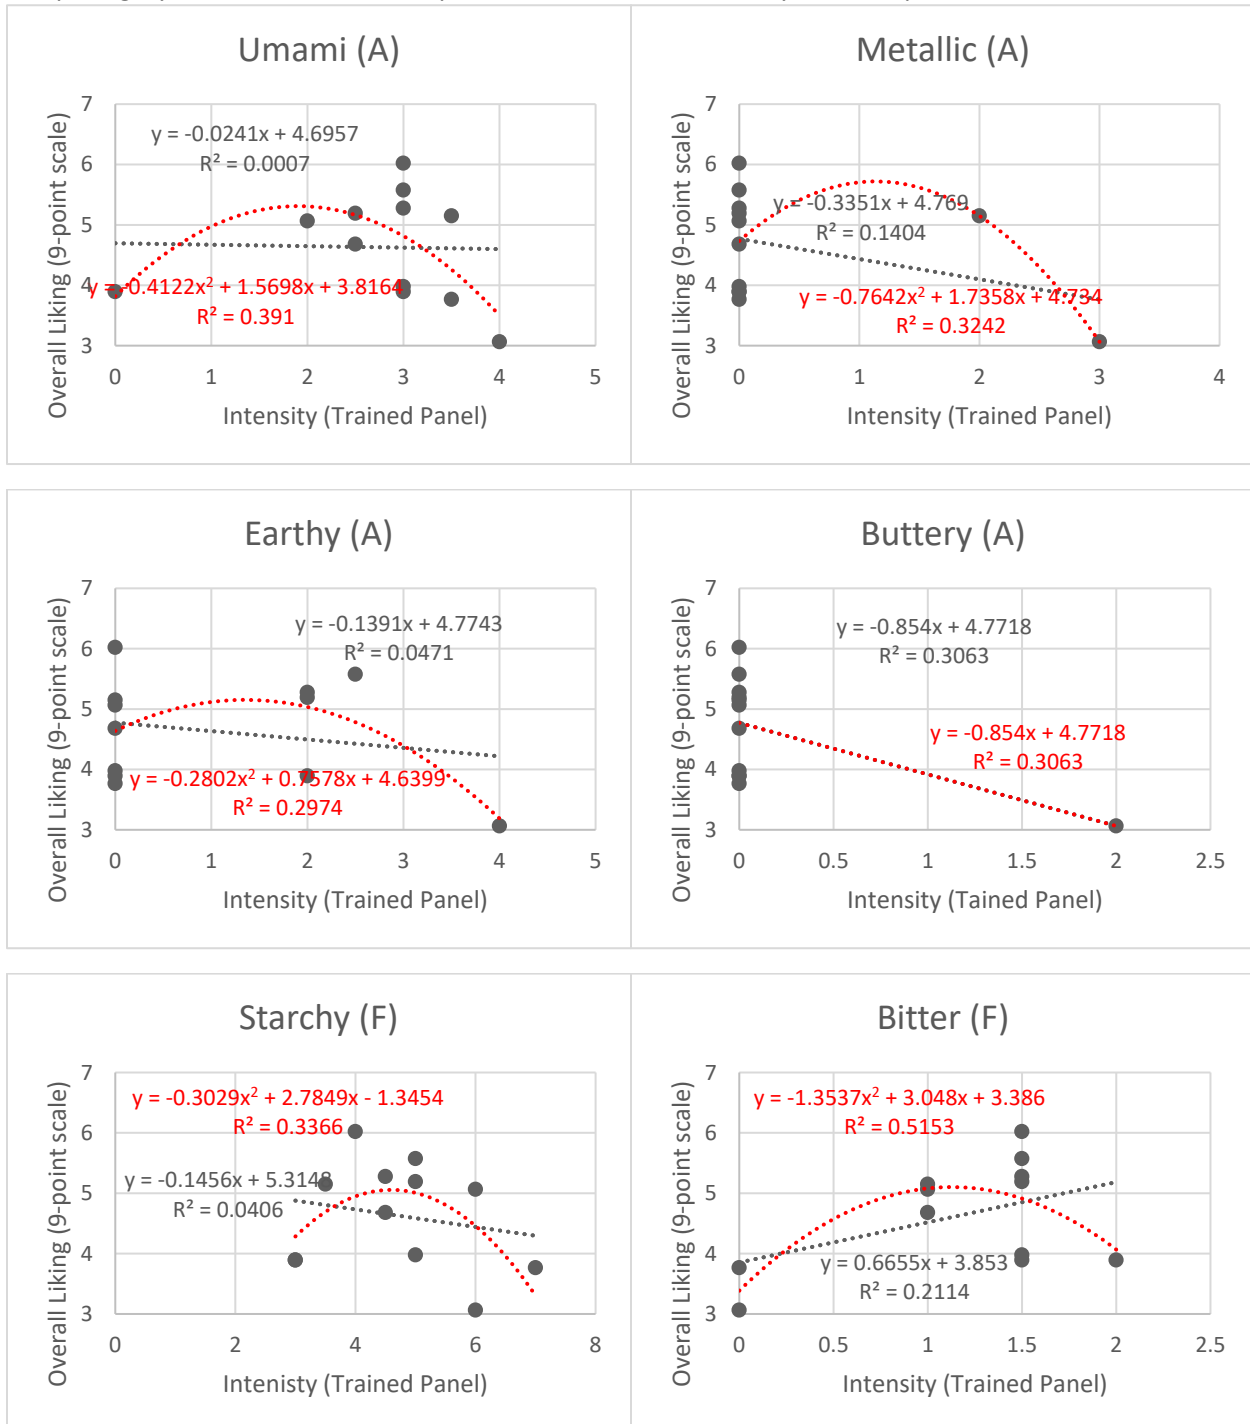

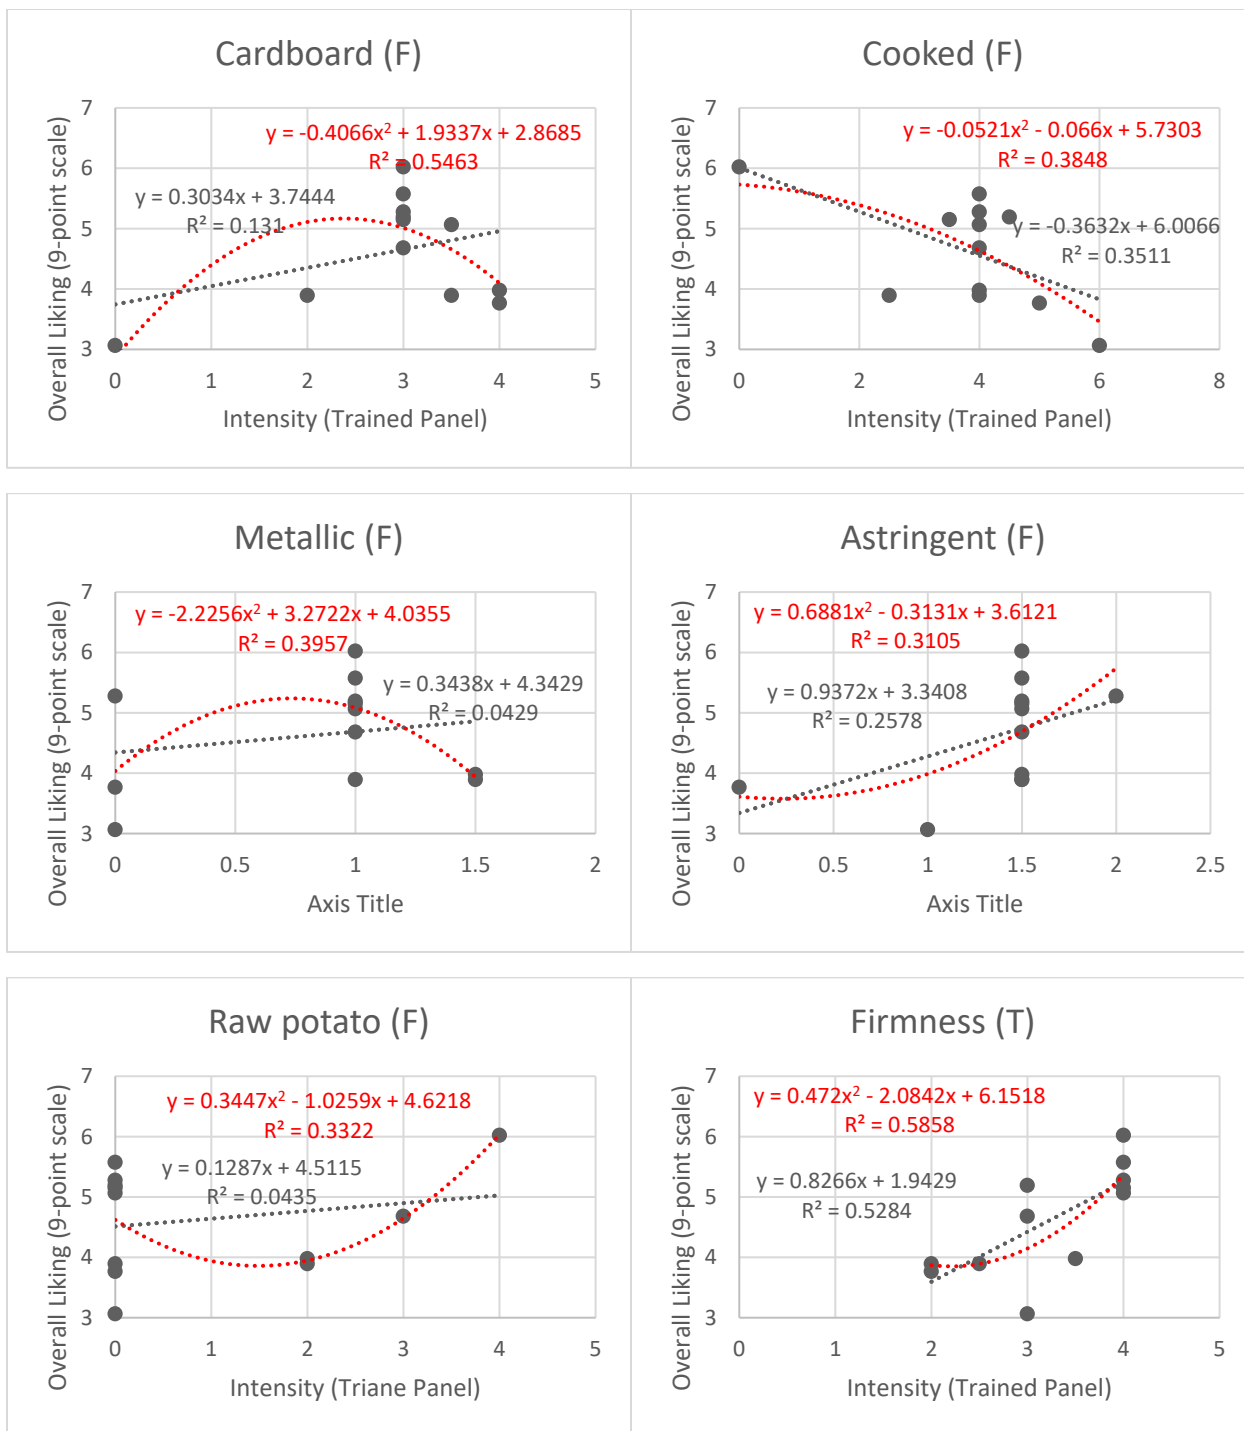

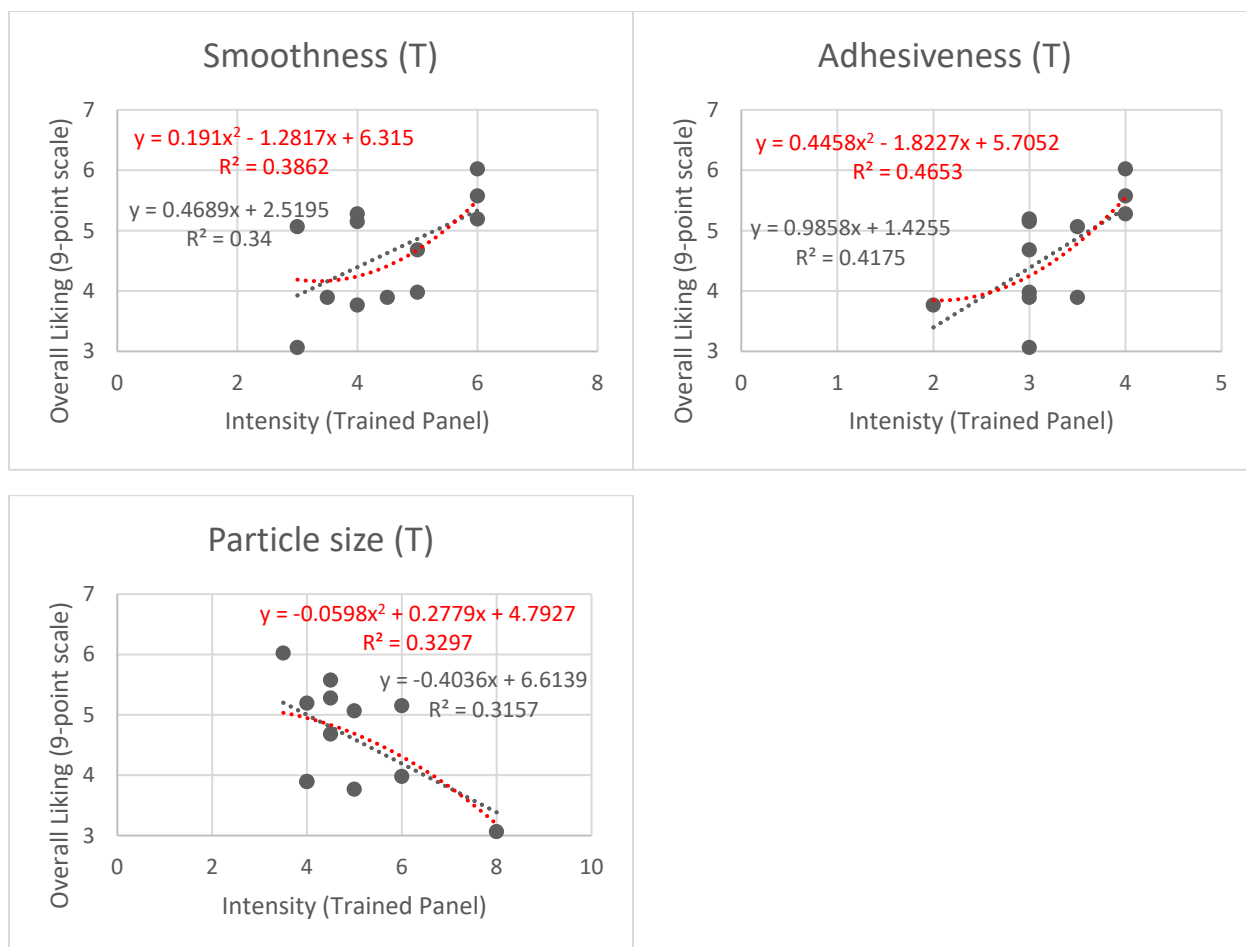

**Fig. 2** IPM trace plots of each attribute with respect to consumers in cluster 3 OVERALL LIKING for potato samples; grey dotted line – Linear equation, red dotted line – Polynomial equation

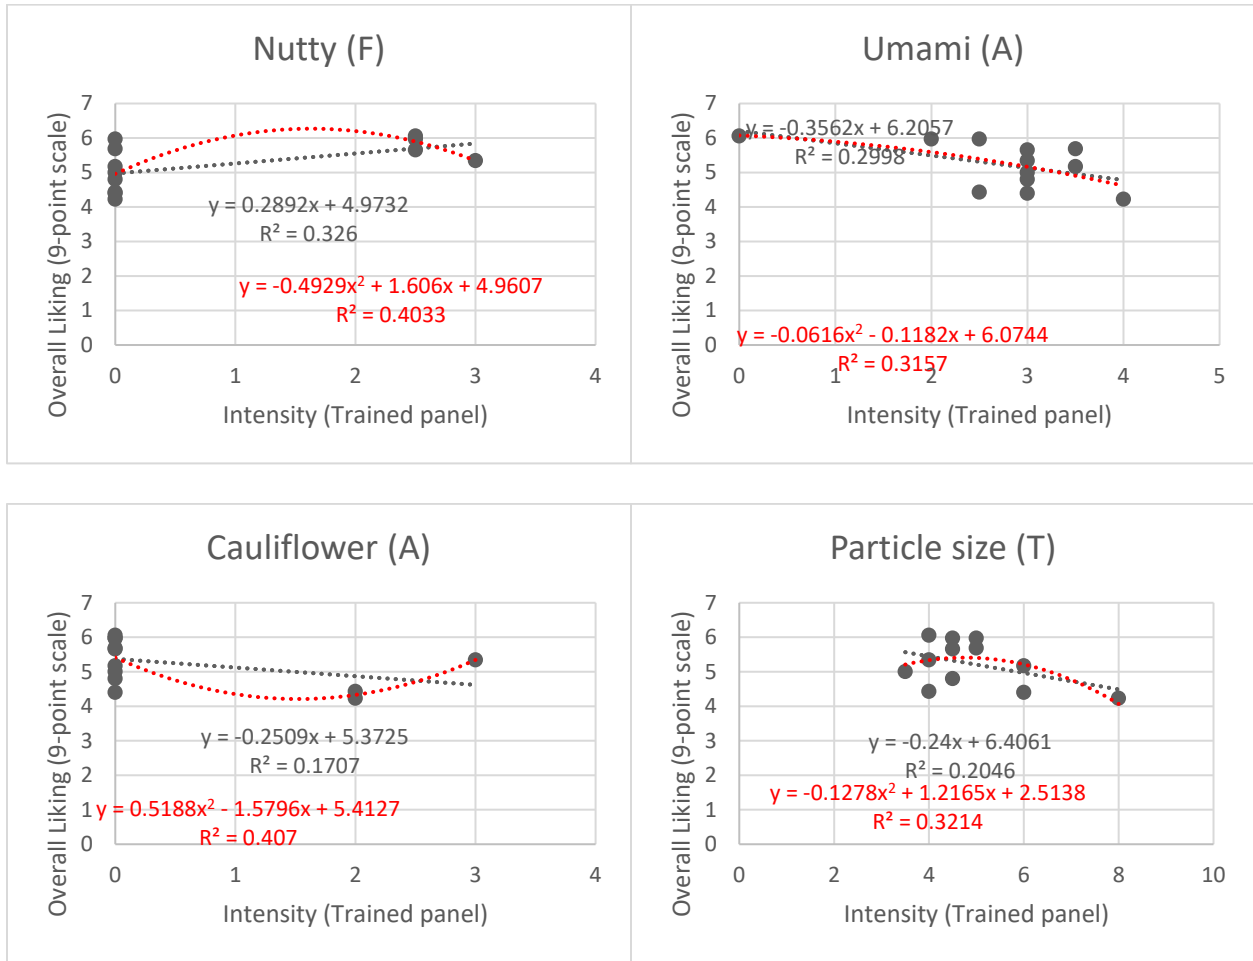

**Fig. 3** Relation of opinion to obtained segments<sup>4</sup>

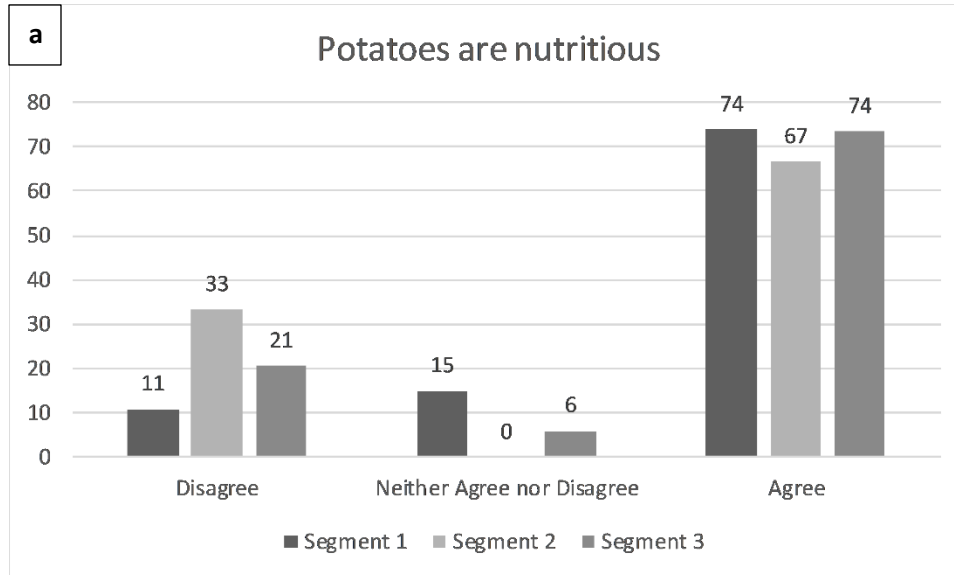

**Opinion – Potatoes are nutritious<sup>♦</sup> (N = 95)**

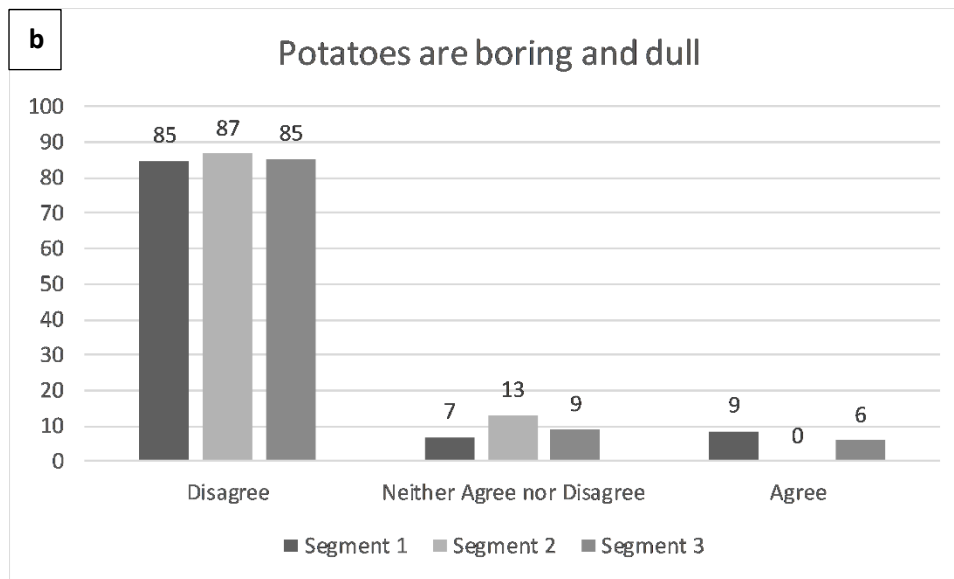

**Opinion – Potatoes are boring and dull<sup>♦</sup> (N = 95)**

<sup>4</sup> Under the null hypothesis of no association between the held by a sample of people with their segments opinion (a to j, respectively).  $\chi^2$  test of association was used to test the hypothesis.

<sup>♦</sup> not significant

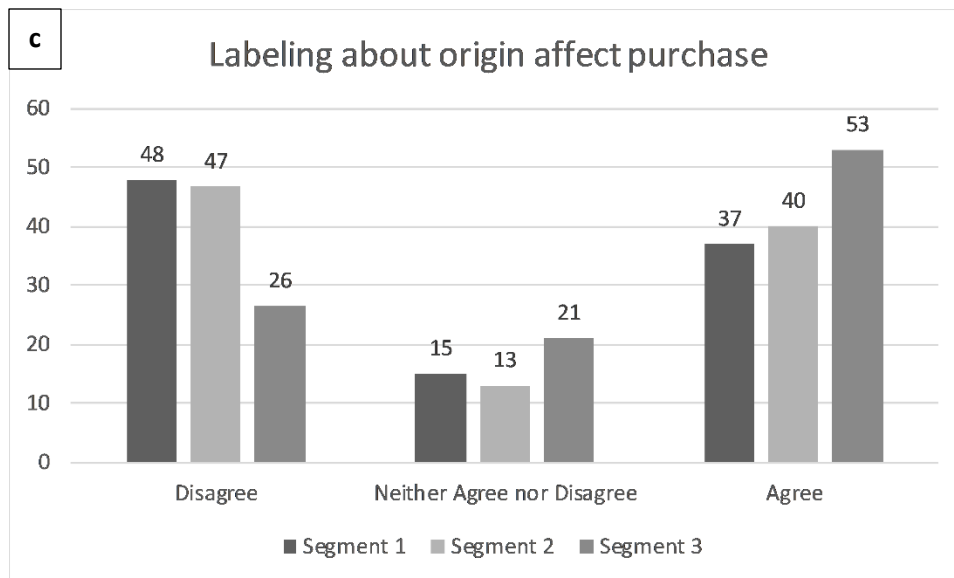

**Opinion** – Labeling about origin (like Idaho, Colorado, etc.) of potatoes influence my purchase decision<sup>♦</sup>  
(N = 95)

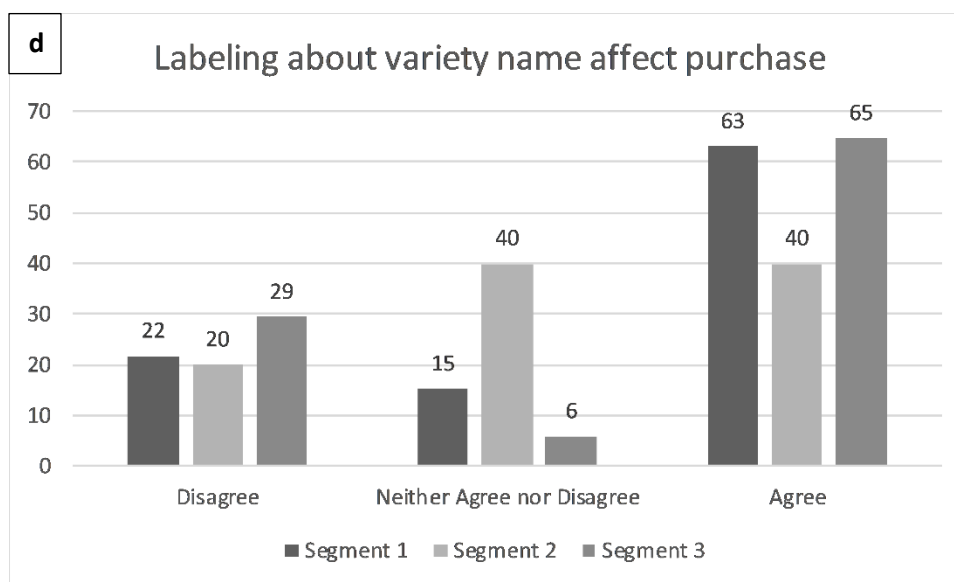

**Opinion** – Labeling about variety name (like Russet Norkotah, Snowden, etc.) on the package influences my purchase decision (N = 95)

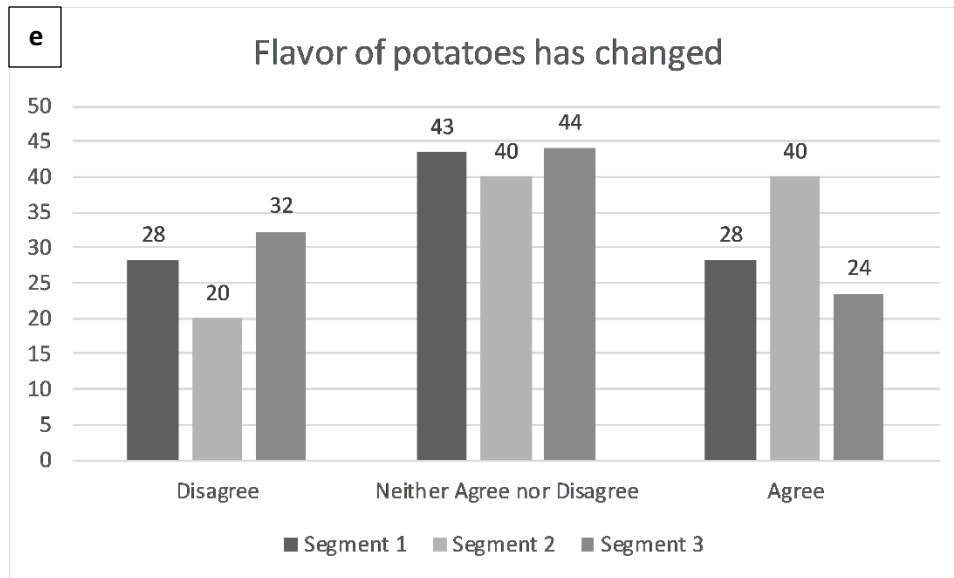

**Opinion** – I believe that the flavor of potatoes has changed historically<sup>♦</sup> (*N* = 95)

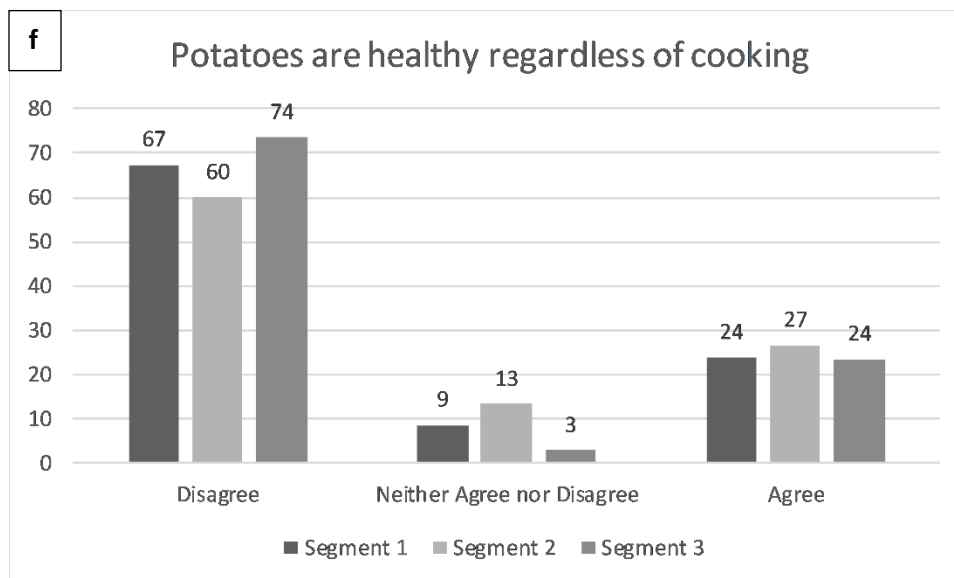

**Opinion** – Potatoes are healthy regardless of the cooking method<sup>♦</sup> (*N* = 95)

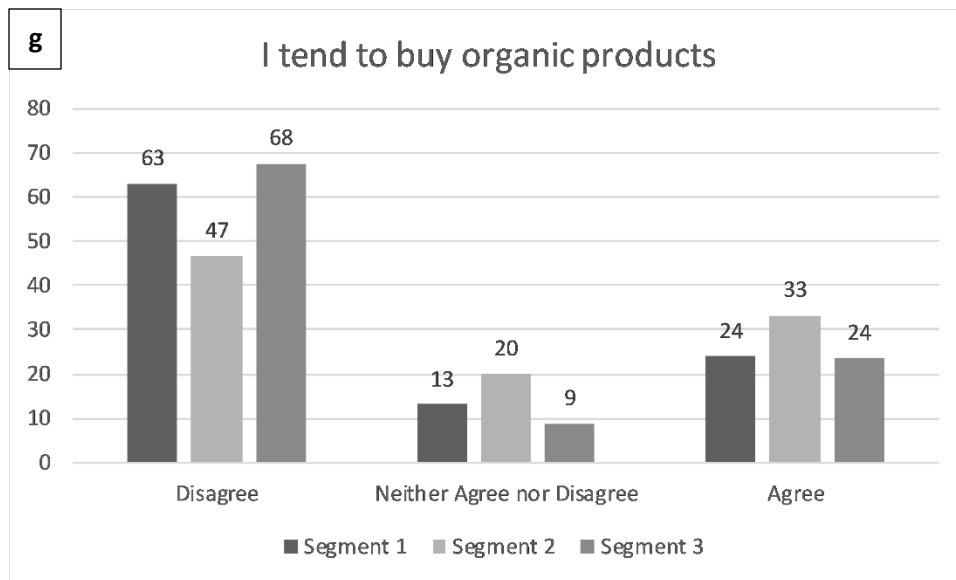

**Opinion – I tend to buy organic products/ingredients<sup>♦</sup> (N = 95)**

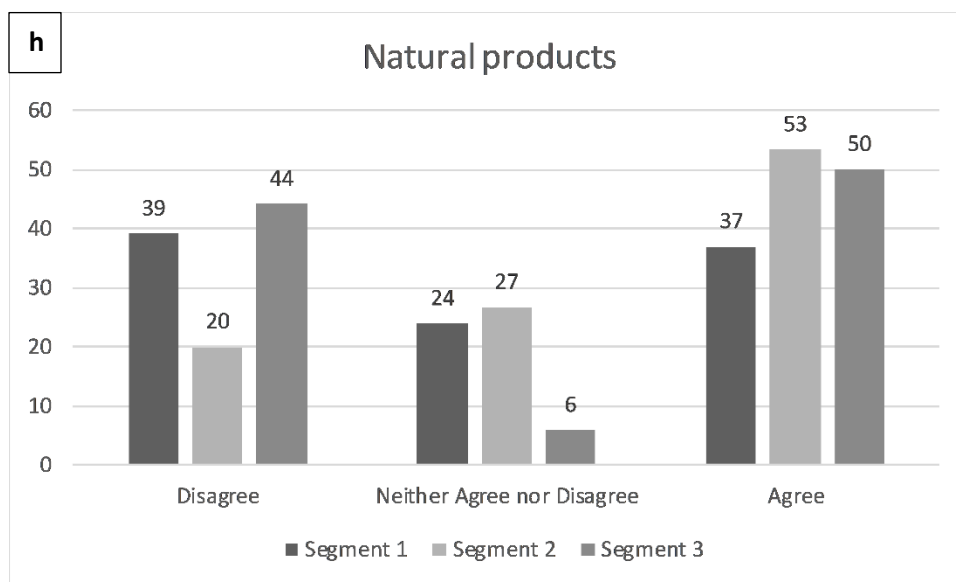

**Opinion – I tend to natural products or ingredients<sup>♦</sup> (N = 95)**

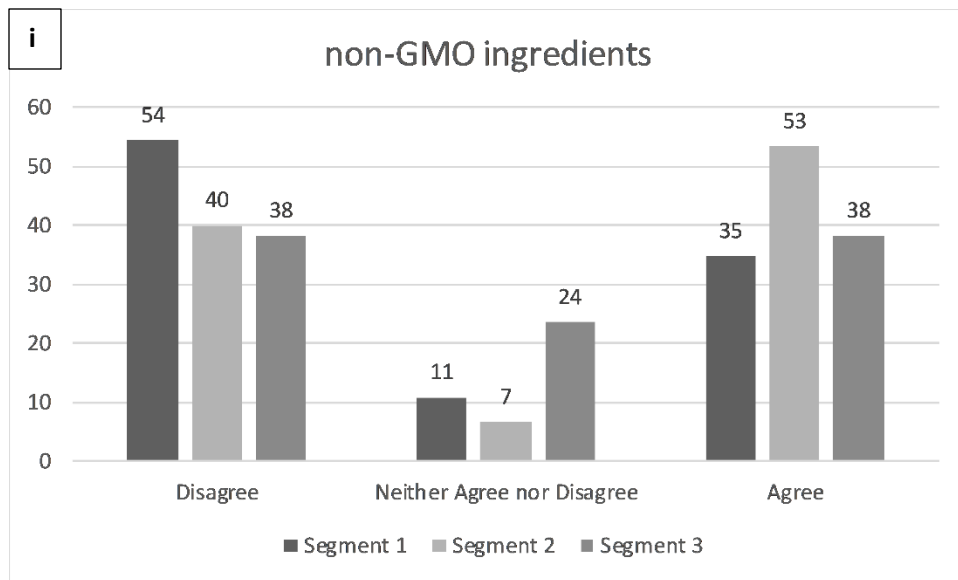

**Opinion** – I look for non-GMO (Genetically modified organisms) ingredients in the food I eat\* ( $N = 95$ )

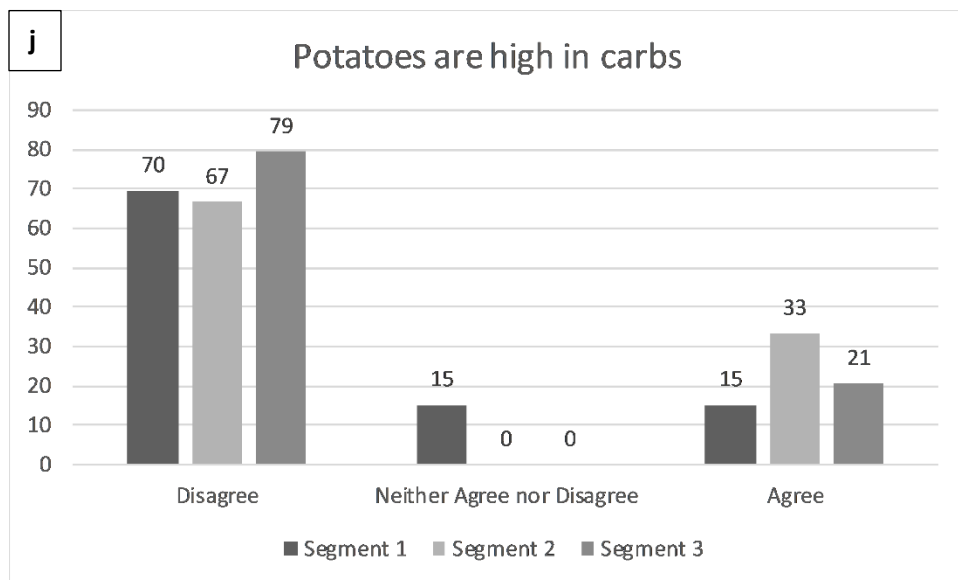

**Opinion** – I avoid potatoes because they are high in carbohydrates ( $N = 95$ )
